# Supplementary material for: Performance comparison of the Maxim and Sedia Limiting Antigen Avidity assays for HIV incidence surveillance
Source: PubMed Central journal article supplement (PMC6660077; doi:10.1371/journal.pone.0220345), 2019-07-26
Supplement: pone.0220345.s001.pdf [file pone.0220345.s001.pdf]

**S1 Table: MDRI and FRR\* estimates in ART-naïve subjects for a range of ODn and viral load thresholds**

| ODn  | VL    | Maxim         |                   | Sedia         |                   |
|------|-------|---------------|-------------------|---------------|-------------------|
|      |       | MDRI (95% CI) | FRR (95% CI)      | MDRI (95% CI) | FRR (95% CI)      |
| ≤    | i     |               |                   |               |                   |
| 0.50 | None  | 129 (113,146) | 1.6% (0.3,4.7)    | 91 (79,105)   | 0.5% (0.0,3.0)    |
| 0.75 | None  | 164 (144,184) | 1.6% (0.3,4.7)    | 127 (111,145) | 1.6% (0.3,4.7)    |
| 1.00 | None  | 197 (176,220) | 2.2% (0.6,5.5)    | 158 (138,179) | 1.6% (0.3,4.7)    |
| 1.25 | None  | 224 (200,248) | 2.7% (0.9,6.2)    | 194 (172,217) | 2.2% (0.6,5.5)    |
| 1.50 | None  | 248 (224,274) | 3.3% (1.2,7.0)    | 215 (192,240) | 2.2% (0.6,5.5)    |
| 1.75 | None  | 277 (251,304) | 3.8% (1.5,7.7)    | 237 (213,263) | 4.4% (1.9,8.4)    |
| 2.00 | None  | 297 (270,324) | 6.5% (3.4,11.1)   | 254 (228,280) | 4.4% (1.9,8.4)    |
| 2.25 | None  | 338 (311,365) | 7.6% (4.2,12.4)   | 292 (265,319) | 6.0% (3.0,10.4)   |
| 2.50 | None  | 382 (354,410) | 11.4% (7.2,16.9)  | 333 (305,362) | 9.8% (5.9,15.0)   |
| 2.75 | None  | 423 (394,453) | 16.9% (11.7,23.1) | 373 (344,401) | 13.0% (8.5,18.8)  |
| 3.00 | None  | 471 (442,500) | 20.1% (14.6,26.6) | 427 (398,457) | 16.3% (11.3,22.5) |
| 0.50 | 0**   | 129 (113,147) | 1.7% (0.4,4.9)    | 91 (79,105)   | 0.6% (0.0,3.1)    |
| 0.50 | 75    | 118 (104,132) | 1.1% (0.1,4.0)    | 83 (73,94)    | 0.6% (0.0,3.1)    |
| 0.50 | 400   | 108 (96,122)  | 0.6% (0.0,3.1)    | 78 (68,88)    | 0.0% (0.0,2.1)    |
| 0.50 | 1,000 | 102 (90,114)  | 0.6% (0.0,3.1)    | 73 (64,82)    | 0.0% (0.0,2.1)    |
| 0.50 | 5,000 | 86 (75,97)    | 0.6% (0.0,3.1)    | 63 (54,72)    | 0.0% (0.0,2.1)    |
| 0.75 | 0**   | 165 (145,186) | 1.7% (0.4,4.9)    | 127 (110,146) | 1.7% (0.4,4.9)    |
| 0.75 | 75    | 151 (133,169) | 1.1% (0.1,4.0)    | 116 (102,132) | 0.6% (0.0,3.1)    |
| 0.75 | 400   | 138 (121,155) | 0.6% (0.0,3.1)    | 106 (93,120)  | 0.6% (0.0,3.1)    |
| 0.75 | 1,000 | 127 (112,144) | 0.6% (0.0,3.1)    | 99 (86,112)   | 0.6% (0.0,3.1)    |
| 0.75 | 5,000 | 106 (92,122)  | 0.6% (0.0,3.1)    | 83 (71,96)    | 0.6% (0.0,3.1)    |
| 1.00 | 0**   | 199 (177,223) | 2.3% (0.6,5.7)    | 159 (139,181) | 1.7% (0.4,4.9)    |
| 1.00 | 75    | 183 (164,205) | 1.1% (0.1,4.0)    | 145 (127,164) | 1.1% (0.1,4.0)    |
| 1.00 | 400   | 168 (149,188) | 1.1% (0.1,4.0)    | 130 (114,148) | 0.6% (0.0,3.1)    |
| 1.00 | 1,000 | 156 (139,176) | 1.1% (0.1,4.0)    | 122 (106,138) | 0.6% (0.0,3.1)    |
| 1.00 | 5,000 | 126 (109,144) | 1.1% (0.1,4.0)    | 101 (86,117)  | 0.6% (0.0,3.1)    |
| 1.25 | 0**   | 226 (202,251) | 2.8% (0.9,6.4)    | 197 (174,221) | 2.3% (0.6,5.7)    |
| 1.25 | 75    | 210 (188,233) | 1.7% (0.4,4.9)    | 180 (161,201) | 1.7% (0.4,4.9)    |
| 1.25 | 400   | 191 (171,212) | 1.7% (0.4,4.9)    | 164 (146,184) | 1.1% (0.1,4.0)    |
| 1.25 | 1,000 | 179 (160,199) | 1.7% (0.4,4.9)    | 153 (135,172) | 1.1% (0.1,4.0)    |
| 1.25 | 5,000 | 141 (123,160) | 1.7% (0.4,4.9)    | 122 (106,140) | 1.1% (0.1,4.0)    |
| 1.50 | 0**   | 250 (225,276) | 3.4% (1.3,7.2)    | 218 (194,244) | 2.3% (0.6,5.7)    |
| 1.50 | 75    | 233 (210,256) | 1.7% (0.4,4.9)    | 202 (180,224) | 1.7% (0.4,4.9)    |
| 1.50 | 400   | 214 (193,237) | 1.7% (0.4,4.9)    | 183 (163,204) | 1.1% (0.1,4.0)    |
| 1.50 | 1,000 | 201 (180,223) | 1.7% (0.4,4.9)    | 171 (152,191) | 1.1% (0.1,4.0)    |
| 1.50 | 5,000 | 158 (138,179) | 1.7% (0.4,4.9)    | 135 (118,154) | 1.1% (0.1,4.0)    |
| 1.75 | 0**   | 279 (252,306) | 3.9% (1.6,7.9)    | 239 (213,266) | 4.5% (2.0,8.7)    |
| 1.75 | 75    | 261 (236,286) | 1.7% (0.4,4.9)    | 222 (199,245) | 2.3% (0.6,5.7)    |
| 1.75 | 400   | 242 (219,266) | 1.7% (0.4,4.9)    | 203 (182,225) | 1.7% (0.4,4.9)    |
| 1.75 | 1,000 | 227 (206,251) | 1.7% (0.4,4.9)    | 190 (170,211) | 1.7% (0.4,4.9)    |
| 1.75 | 5,000 | 175 (155,198) | 1.7% (0.4,4.9)    | 148 (129,168) | 1.7% (0.4,4.9)    |
| 2.00 | 0**   | 299 (272,326) | 6.7% (3.5,11.5)   | 254 (228,282) | 4.5% (2.0,8.7)    |
| 2.00 | 75    | 281 (255,307) | 5.1% (2.3,9.4)    | 236 (212,261) | 2.8% (0.9,6.4)    |
| 2.00 | 400   | 261 (237,286) | 3.9% (1.6,7.9)    | 217 (196,241) | 1.7% (0.4,4.9)    |
| 2.00 | 1,000 | 244 (220,268) | 3.9% (1.6,7.9)    | 204 (183,227) | 1.7% (0.4,4.9)    |
| 2.00 | 5,000 | 188 (166,210) | 3.9% (1.6,7.9)    | 160 (141,180) | 1.7% (0.4,4.9)    |
| 2.25 | 0**   | 339 (312,367) | 7.9% (4.4,12.8)   | 292 (265,320) | 6.2% (3.1,10.8)   |
| 2.25 | 75    | 321 (295,348) | 6.2% (3.1,10.8)   | 274 (249,300) | 4.5% (2.0,8.7)    |
| 2.25 | 400   | 300 (276,326) | 4.5% (2.0,8.7)    | 253 (230,278) | 3.4% (1.3,7.2)    |

| ODn  | VL    | Maxim         |                   | Sedia         |                   |
|------|-------|---------------|-------------------|---------------|-------------------|
|      |       | MDRI (95% CI) | FRR (95% CI)      | MDRI (95% CI) | FRR (95% CI)      |
| ≤    | $i$   |               |                   |               |                   |
| 2.25 | 1,000 | 280 (255,306) | 4.5% (2.0,8.7)    | 237 (214,261) | 3.4% (1.3,7.2)    |
| 2.25 | 5,000 | 214 (190,239) | 3.9% (1.6,7.9)    | 186 (164,209) | 2.8% (0.9,6.4)    |
| 2.50 | 0**   | 383 (354,411) | 11.2% (7.0,16.8)  | 335 (306,364) | 10.1% (6.1,15.5)  |
| 2.50 | 75    | 364 (336,392) | 9.6% (5.7,14.9)   | 316 (289,344) | 8.4% (4.8,13.5)   |
| 2.50 | 400   | 343 (316,371) | 7.9% (4.4,12.8)   | 296 (269,322) | 6.7% (3.5,11.5)   |
| 2.50 | 1,000 | 321 (294,350) | 7.9% (4.4,12.8)   | 278 (252,305) | 6.7% (3.5,11.5)   |
| 2.50 | 5,000 | 252 (225,280) | 6.2% (3.1,10.8)   | 220 (194,246) | 5.1% (2.3,9.4)    |
| 2.75 | 0**   | 426 (397,455) | 17.4% (12.2,23.8) | 375 (346,405) | 13.5% (8.8,19.4)  |
| 2.75 | 75    | 406 (377,434) | 15.7% (10.7,21.9) | 357 (328,386) | 11.8% (7.5,17.5)  |
| 2.75 | 400   | 384 (355,413) | 13.5% (8.8,19.4)  | 336 (308,364) | 10.1% (6.1,15.5)  |
| 2.75 | 1,000 | 363 (334,393) | 13.5% (8.8,19.4)  | 315 (287,343) | 9.6% (5.7,14.9)   |
| 2.75 | 5,000 | 285 (256,315) | 10.7% (6.6,16.2)  | 250 (223,279) | 6.2% (3.1,10.8)   |
| 3.00 | 0**   | 475 (445,505) | 20.8% (15.1,27.5) | 431 (401,461) | 16.9% (11.7,23.2) |
| 3.00 | 75    | 455 (426,483) | 19.1% (13.6,25.7) | 412 (382,441) | 15.2% (10.2,21.3) |
| 3.00 | 400   | 430 (401,459) | 16.9% (11.7,23.2) | 391 (362,420) | 13.5% (8.8,19.4)  |
| 3.00 | 1,000 | 408 (379,437) | 16.9% (11.7,23.2) | 369 (340,396) | 13.5% (8.8,19.4)  |
| 3.00 | 5,000 | 326 (297,358) | 12.9% (8.4,18.8)  | 296 (266,327) | 9.6% (5.7,14.9)   |

\*Naïvely-estimated FRR, i.e. not adapted to epidemiological context.

\*\*No viral load threshold is applied, but analysis restricted to specimens that have viral load data available.
