# Supplementary material for: Performance comparison of the Maxim and Sedia Limiting Antigen Avidity assays for HIV incidence surveillance
Source: PubMed Central journal article supplement (PMC6660077; doi:10.1371/journal.pone.0220345), 2019-07-26
Supplement: pone.0220345.s002.pdf [file pone.0220345.s002.pdf]

**S2 Table: Context-specific MDRI and FRR estimates from the three demonstrative surveillance scenarios under different assumptions about impact of ARV exposure testing on FRR**

| Assay | ODn | Scenario <sup>§</sup> | MDRI <sup>†</sup><br>(95% CI) | Assumption 1*  |       | Assumption 2** |       |
|-------|-----|-----------------------|-------------------------------|----------------|-------|----------------|-------|
|       |     |                       |                               | FRR (95% CI)   | RSE   | FRR (95% CI)   | RSE   |
| Maxim | 0.5 | A                     | 88 (74,104)                   | 0.0% (0.0,0.1) | 16.7% | 0.6% (0.1,2.4) | 63.8% |
| Maxim | 1.0 | A                     | 140 (119,165)                 | 0.3% (0.0,0.8) | 19.0% | 0.9% (0.1,3.0) | 46.8% |
| Maxim | 1.5 | A                     | 186 (159,214)                 | 0.3% (0.0,0.9) | 15.6% | 1.0% (0.2,3.3) | 38.1% |
| Maxim | 2.0 | A                     | 228 (196,261)                 | 0.4% (0.1,1.0) | 13.8% | 1.2% (0.3,3.7) | 34.2% |
| Maxim | 2.5 | A                     | 313 (273,353)                 | 0.8% (0.4,1.5) | 11.8% | 1.7% (0.7,4.4) | 27.3% |
| Sedia | 0.5 | A                     | 73 (61,85)                    | 0.0% (0.0,0.0) | 16.1% | 0.5% (0.0,2.0) | 63.5% |
| Sedia | 1.0 | A                     | 101 (86,120)                  | 0.0% (0.0,1.0) | 14.7% | 0.7% (0.1,2.6) | 58.9% |
| Sedia | 1.5 | A                     | 151 (130,174)                 | 0.1% (0.0,0.2) | 12.3% | 0.8% (0.1,2.8) | 42.1% |
| Sedia | 2.0 | A                     | 186 (159,215)                 | 0.1% (0.0,0.2) | 11.7% | 0.8% (0.1,3.0) | 36.5% |
| Sedia | 2.5 | A                     | 272 (234,311)                 | 0.7% (0.3,1.3) | 13.1% | 1.5% (0.6,4.1) | 30.0% |
| Maxim | 0.5 | B                     | 88 (74,104)                   | 0.0% (0.0,0.1) | 16.7% | 0.6% (0.1,2.4) | 63.8% |
| Maxim | 1.0 | B                     | 140 (119,165)                 | 0.3% (0.0,0.8) | 19.0% | 0.9% (0.1,2.0) | 46.8% |
| Maxim | 1.5 | B                     | 186 (159,214)                 | 0.3% (0.0,0.9) | 15.6% | 1.0% (0.2,3.3) | 38.1% |
| Maxim | 2.0 | B                     | 228 (196,261)                 | 0.4% (0.1,1.0) | 13.8% | 1.2% (0.3,3.7) | 34.2% |
| Maxim | 2.5 | B                     | 313 (273,353)                 | 0.8% (0.4,1.5) | 11.8% | 1.7% (0.7,4.4) | 27.3% |
| Sedia | 0.5 | B                     | 73 (61,85)                    | 0.0% (0.0,0.0) | 16.1% | 0.5% (0.0,0.2) | 63.5% |
| Sedia | 1.0 | B                     | 101 (86,120)                  | 0.0% (0.0,0.1) | 14.7% | 0.7% (0.1,2.6) | 58.9% |
| Sedia | 1.5 | B                     | 151 (130,174)                 | 0.1% (0.0,0.2) | 12.3% | 0.8% (0.1,2.8) | 42.1% |
| Sedia | 2.0 | B                     | 186 (159,215)                 | 0.1% (0.0,0.2) | 11.7% | 0.8% (0.1,3.0) | 36.5% |
| Sedia | 2.5 | B                     | 272 (234,311)                 | 0.7% (0.3,1.3) | 13.1% | 1.5% (0.6,4.1) | 29.9% |
| Maxim | 0.5 | C                     | 88 (74,104)                   | 0.0% (0.0,0.1) | 16.7% | 0.6% (0.1,2.4) | 63.8% |
| Maxim | 1.0 | C                     | 140 (119,165)                 | 0.3% (0.0,0.8) | 19.0% | 0.9% (0.1,3.0) | 46.8% |
| Maxim | 1.5 | C                     | 186 (159,214)                 | 0.3% (0.0,0.9) | 15.6% | 1.0% (0.2,3.3) | 38.1% |
| Maxim | 2.0 | C                     | 228 (196,261)                 | 0.4% (0.1,1.0) | 13.8% | 1.2% (0.3,3.7) | 34.2% |
| Maxim | 2.5 | C                     | 313 (273,353)                 | 0.8% (0.4,1.5) | 11.8% | 1.7% (0.7,4.4) | 27.3% |
| Sedia | 0.5 | C                     | 73 (61,85)                    | 0.0% (0.0,0.0) | 16.1% | 0.5% (0.0,2.0) | 63.5% |
| Sedia | 1.0 | C                     | 101 (86,120)                  | 0.0% (0.0,0.1) | 14.7% | 0.7% (0.1,2.6) | 58.9% |
| Sedia | 1.5 | C                     | 151 (130,174)                 | 0.1% (0.0,0.2) | 12.3% | 0.8% (0.1,2.8) | 42.0% |
| Sedia | 2.0 | C                     | 186 (159,215)                 | 0.1% (0.0,0.2) | 11.7% | 0.8% (0.1,3.0) | 36.5% |
| Sedia | 2.5 | C                     | 272 (234,311)                 | 0.7% (0.3,1.3) | 13.1% | 1.5% (0.6,4.1) | 29.9% |

<sup>§</sup>Scenario **A**: South Africa-like epidemic; **B**: Kenya-like epidemic; **C**: Concentrated epidemic.

<sup>†</sup>Adjusted for subtype mix and screening assay

\* ARV exposure testing classifies all treated subjects as long-term

\*\* ARV exposure testing reduces FRR in treated subjects to 10% of FRR without viral load
